# Supplementary material
Source: PubMed Central journal article supplement (PMC8252539)
Supplement: FSB2-35-0-s001.pdf [file FSB2-35-0-s001.pdf]

**A CELL-PENETRATING CD40-TRAF2,3 BLOCKING PEPTIDE DIMINISHES  
INFLAMMATION AND NEURONAL LOSS AFTER ISCHEMIA/REPERFUSION**

Jose-Andres C. Portillo, Jin-Sang Yu, Samuel Hansen, Timothy S. Kern, M. Cecilia Subauste and  
Carlos S. Subauste

|                   | Forward                            | Reverse                          |
|-------------------|------------------------------------|----------------------------------|
| ICAM-1 (1)        | 5'-GCCTTGGTAGAGGTGACTGAG-3'        | 5'-GACCCGAGCTGAAAAGTTGTA-3'      |
| CXCL1 (2)         | 5'-ACAGTCCCCTGACCAAGAG-3'          | 5'-CACTGACAGCGCAGCTCATT-3'       |
| NOS2 (1)          | 5'-CAGCTGGGCTGTACAAACCTT-3'        | 5'-CATTGGAAGTCAAGCGTTTCG-3'      |
| COX-2 (3)         | 5'-CACAGCCTACCAAAACAGCCA-3'        | 5'-GCTCAGTTGAACGCCTTTTGA-3'      |
| TNF- $\alpha$ (4) | 5'-CATCTTCTCAAAATTCGAGTGACAA-3'    | 5'-TGGGAGTAGACAAGGTACAACCC-3'    |
| IL-1 $\beta$ (5)  | 5'-CAACCAACAAGTGATATTCTCCAT G-3'   | 5'-GATCCACACTCTCCAGCTGCA-3'      |
| IFN- $\gamma$ (4) | 5'-CATTGAAAGCCTAGAAAGTCTGAATAAC-3' | 5'-TGGCTCTGCAGGATTTTCATG-3'      |
| IL-12 p40 (5)     | 5'-GGAAGCACGGCAGCAGAATA-3'         | 5'-AACTTGAGGGAGAAGTAGGAATGG-3'   |
| 18S rRNA (6)      | 5'-ACTCAACACGGGAAACCTCACC-3'       | 5'-CCAGACAAATCGCTCCACCAAC-3'     |
| <i>B1</i> (7)     | 5'-AACGGGCGAGTAGCACCTGAGGAGA-3'    | 5'-TGGGTCTACGTCGATGGCATGACAAC-3' |
| <i>L32</i> (8)    | 5'-TGTGCAACAAATCTTCACCGTGC-3'      | 5'-GGATTGGTGA CTCTGATGGCC-3'     |

**Table S1. Oligonucleotide primer sequences for real-time PCR amplification.**

1. Park, E.-M., Cho, S., Frys, K., Racchumi, G., Zhou, P., Anrather, J., and Iadecola, C. (2004) Interaction between inducible nitric oxide synthase and poly(ADP-ribose) polymerase in focal ischemic brain injury. *Stroke* **35**, 2896-2901
2. Zhou, J. T., Pham, L., Zhang, N., He, S., Gamulescu, M.-A., Spee, C., Ryan, J., and Hinton, D. R. (2005) Neutrophils promote experimental choroidal neovascularization. *Mol. Vision* **11**, 414-424
3. Wei, X., Zhang, X., Zuscik, M. J., Drissi, M. H., Schwarz, E. M., and O'Keefe, R. J. (2005) Fibroblasts express RANKL and support osteoclastogenesis in a COX-2-dependent manner after stimulation with titanium particles. *J. Bone Min. Res.* **20**
4. Johnson, L. L., Lanthier, P., Hoffman, J., and Chen, W. (2004) Vaccination protects B cell-deficient mice against an oral challenge with mildly virulent *Toxoplasma gondii*. *Vaccine* **22**, 4054-4061
5. Overbergh, L., Valckx, D., Waer, M., and Mathieu, C. (1999) Quantification of murine cytokine mRNAs using real time quantitative reverse transcriptase PCR. *Cytokine* **11**, 305-312
6. Subauste, C. S., Subauste, A., and Wessendarp, M. (2007) Role of CD40-dependent down-regulation of CD154 in impaired induction of CD154 in CD4<sup>+</sup> T cells from HIV-1-infected patients. *J. Immunol.* **178**, 1645-1653
7. Bretagne, S., Costa, J. M., Vidaud, M., Tran Van Nhieu, J., and Fleury-Feith, J. (1993) Detection of *Toxoplasma gondii* by competitive DNA amplification of bronchoalveolar lavage samples. *J. Infect. Dis.* **168**, 1585-1588
8. Portillo, J.-A. C., Okenka, G., Reed, E., Subauste, A., Van Grol, J., Gentil, K., Komatsu, M., Tanaka, K., Landreth, G., Levine, B., and Subauste, C. S. (2010) The CD40-autophagy pathway is needed for host protection despite IFN- $\gamma$ -dependent immunity and CD40 induces autophagy via control of p21 levels. *Plos One* **e14472**

| Reagent            | Clone     | Source        |
|--------------------|-----------|---------------|
| ICAM-PE            | YN1/1.7.4 | BioLegend     |
| CD19-FITC          | 1D3/CD19  | BioLegend     |
| CD80-BV650         | 16-10A1   | BioLegend     |
| CD86-AF700         | GL-1      | BioLegend     |
| MHC II-BUV395      | 2G9       | BD Bioscience |
| CD3-PE/Cy7         | 17A2      | BioLegend     |
| CD11b-PE           | M1/70     | BioLegend     |
| CD11c-BV421        | N418      | BioLegend     |
| Live Dead kit Aqua | -         | BioLegend     |

**Table S2. Reagents for flow cytometry of spleen cells.**

Figure S1

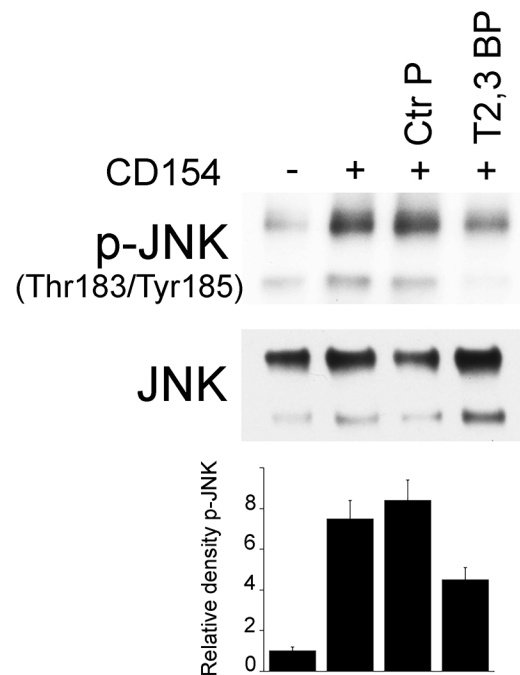

ri CD40-TRAF2,3 blocking peptide inhibits CD40-driven JNK phosphorylation. Human retinal Müller cells were treated with ri control peptide (Ctr P) or ri CD40-TRAF2,3 blocking peptide (T2,3 BP; both at 1  $\mu$ M) followed by stimulation with CD154 for 15 min. Total JNK and phospho-Thr183/Tyr185 JNK were assessed by immunoblot. Relative density of phospho-JNK was obtained by normalization to total JNK. Relative density of phospho-JNK for the unstimulated sample was given a value of 1. Densitometry data represent means  $\pm$  SD of 3 independent experiments.

Figure S2

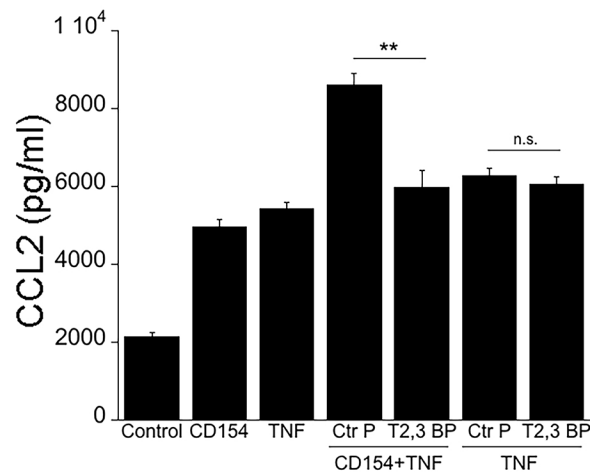

ri CD40-TRAF2,3 blocking peptide inhibits CD40-driven chemokine upregulation. Human retinal endothelial cells were treated with ri control peptide (Ctr P) or ri CD40-TRAF2,3 blocking peptide (T2,3 BP; both at 1  $\mu$ M) followed by stimulation with CD154 with or without TNF- $\alpha$  (30 pg/ml) for 24 h. Secretion of CCL2 was examined at 24 h by ELISA. Data shown represent Mean  $\pm$  SD of triplicate samples. Results are representative of 3 independent experiments. \*\*P<0.01 by ANOVA.

Figure S3

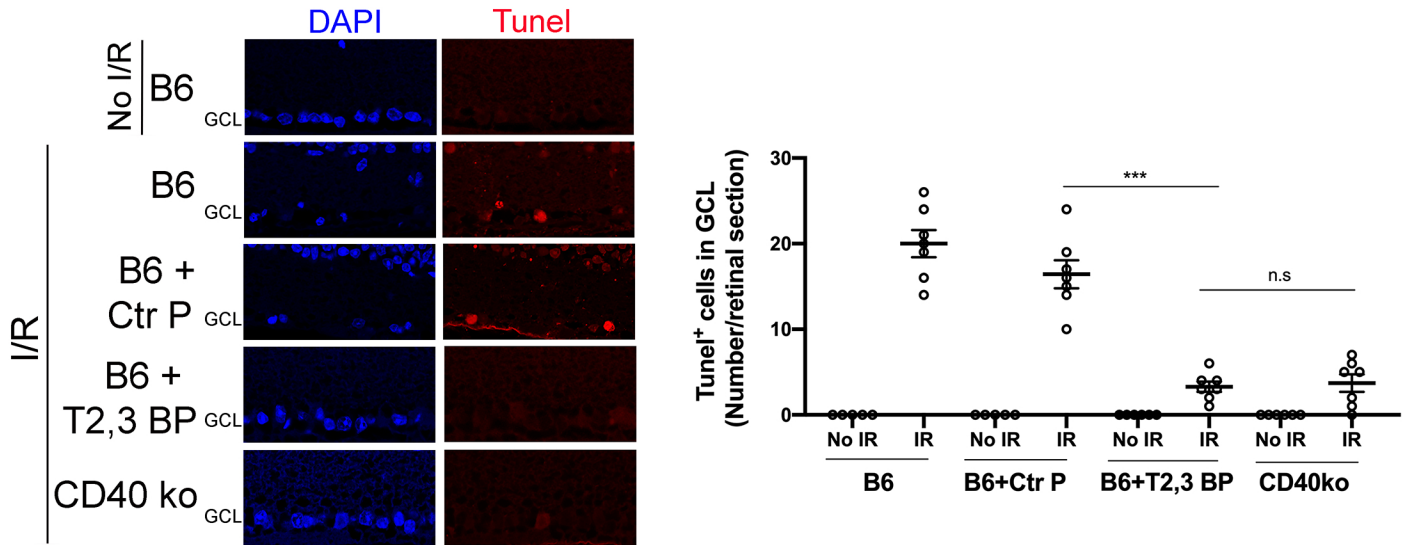

ri CD40-TRAF2,3 blocking peptide protects against programmed cell death in the GCL of retinas subjected to I/R. One eye from each B6 and Cd40<sup>-/-</sup> mouse was subjected to I/R. Contralateral non-ischemic eye was used as control. Eyes subjected to I/R in B6 mice were treated intravitreally with or without ri control peptide (Ctr P) or ri CD40-TRAF2,3 blocking peptide (T2,3 BP) 1 hr. prior to increase in IOP. Eyes were collected 2 d after I/R and were stained with ApopTag Red, In situ Apoptosis Detection kit. Original magnification X400. Scale bar, 50  $\mu$ m. GCL = Ganglion cell layer). TUNEL+ cells in the GCL were counted in whole retinal sections. Horizontal bars represent mean  $\pm$  SEM (7 mice per group). \*\*\*P < 0.001 by ANOVA.

Figure S4

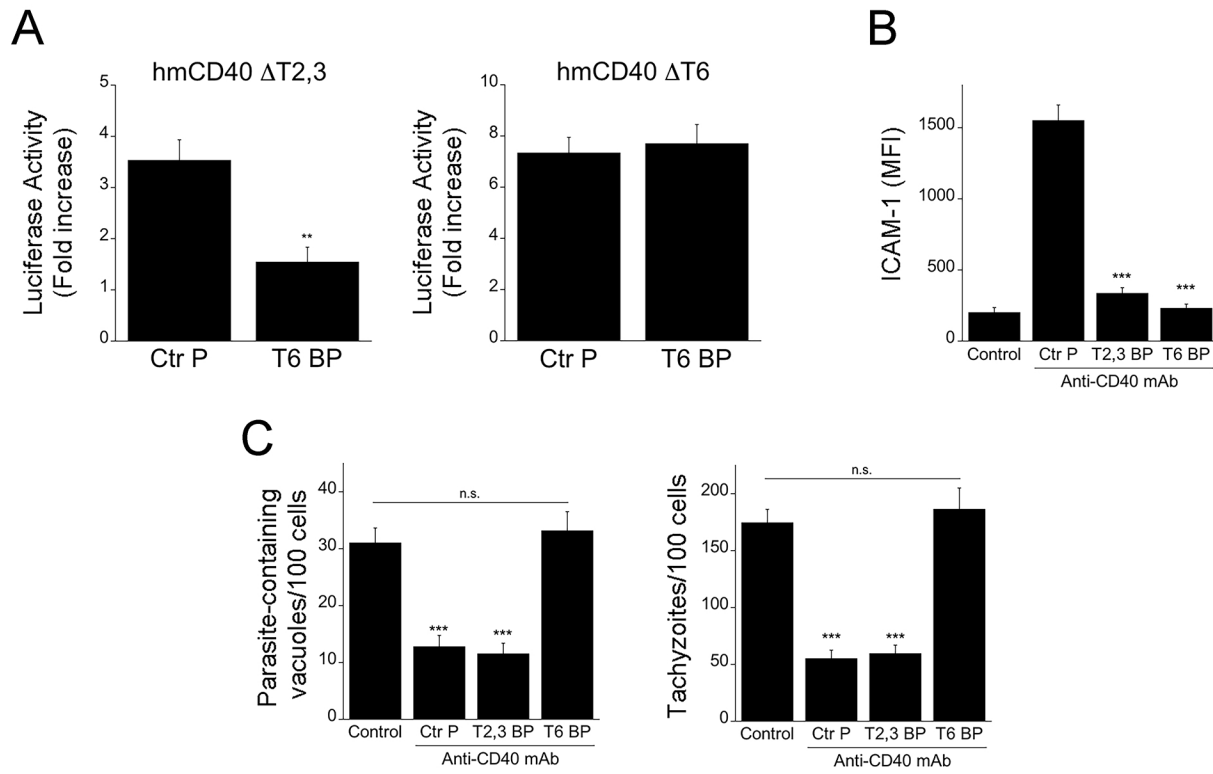

ri CD40-TRAF6 blocking peptide inhibits CD40-TRAF6 signaling, impairs CD40-driven adhesion molecule upregulation and CD40-induced toxoplasmodicidal activity. **A**, Mouse endothelial cells (mHEVc) that express an NF- $\kappa$ B response element that drives transcription of a luciferase reporter plus either hmCD40  $\Delta$ T2,3 or hmCD40  $\Delta$ T6 were pre-incubated with ri Tat peptide (Ctrl P) or ri CD40-TRAF6 blocking peptide (T6 BP; both at 1  $\mu$ M) or medium alone followed by stimulation with human CD154. Data are expressed as fold-increase in normalized luciferase activity in cells stimulated with CD154 compared to cells treated with respective peptide in the absence of CD154. **B**, Mouse retinal endothelial cells were treated with ri Tat peptide (Ctrl P), ri CD40-TRAF2,3 (T2,3 BP) or ri CD40-TRAF6 blocking peptide (T6 BP; all 1  $\mu$ M) followed by incubation with a stimulatory anti-CD40 mAb for 24 h. Expression of ICAM-1 was assessed by flow cytometry. **C**, Mouse retinal endothelial cells were treated as above and infected with *T. gondii* tachyzoites. The numbers of vacuoles and tachyzoites per 100 cells were assessed at 24 hr. Data shown represent mean  $\pm$  SD of triplicate samples. Results are representative of 3 independent experiments. \*\*P<0.01 by ANOVA.

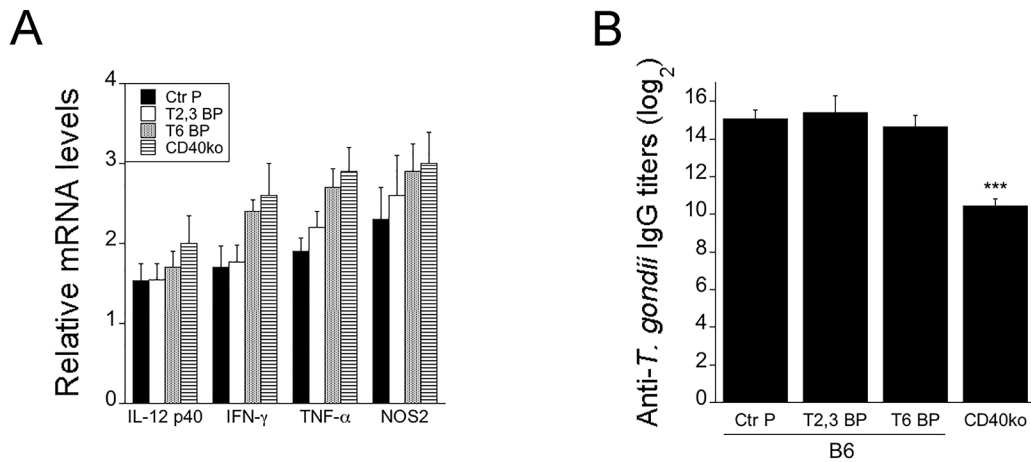

Effect of CD40 and blocking peptides on the expression of IL-12, IFN- $\gamma$ , TNF- $\alpha$  and NOS2 mRNA levels in the eyes of *T. gondii*-infected mice and on serum anti-*T. gondii* IgG levels. B6 and Cd40<sup>-/-</sup> mice were infected with *T. gondii* tissue cysts. B6 mice received peptides intravitreally in both eyes 4 days after infection. *A*, Eyes were collected 14 d post-infection. Levels of IL-12 p40, IFN- $\gamma$ , TNF- $\alpha$  and NOS2 mRNA were assessed by real time PCR. One infected B6 mouse was given an arbitrary value of 1. Data are expressed as fold-increase compared to this animal. Each group contained 4-7mice. *B*, Serum anti-*T. gondii* IgG titers at 14 d post-infection. Results are shown as the mean  $\pm$  SEM.



Figure S6

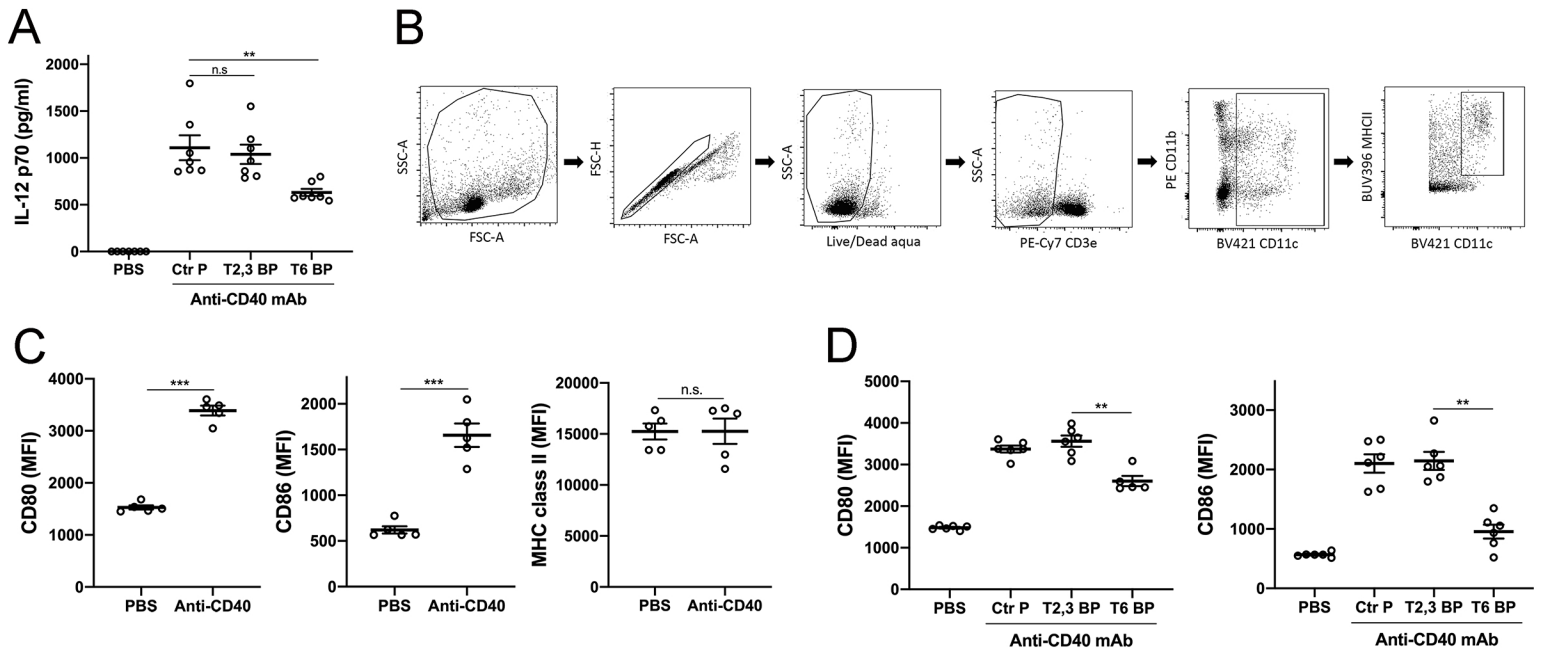

The ri CD40-TRAF6 but not the ri CD40-TRAF2,3 blocking peptide impairs IL-12 p70 production and dendritic cell activation after systemic administration of stimulatory anti-CD40 mAb. B6 mice were injected i.p. with 100  $\mu$ g of stimulatory anti-CD40 mAb or PBS. Mice received peptides (10  $\mu$ g/kg ii.p.) 3 h prior to anti-CD40 mAb. **A**, Serum levels of IL-12 p70 were assessed by ELISA after 24 hr. **B-D**, Splenocytes were isolated 48 h after administration of anti-CD40 mAb and subjected to flow cytometric analysis. **B**, Dot plots show gating strategy for dendritic cells. **C**, Expression of CD80, CD86 and MHC class II were assessed on gated dendritic cells. **D**, Expression of CD80 and CD86 on gated dendritic cells after administration of peptides. Results show median  $\pm$  SEM of 5-7 mice per group and are representative of 3 independent experiments. \* $P$ <0.05; \*\* $P$ <0.01 by ANOVA.
